# Supplementary material for: Neuromuscular and Neuromuscular Junction Manifestations of the PURA-NDD: A Systematic Review of the Reported Symptoms and Potential Treatment Options
Source: MDPI journal article supplement (doi:10.3390/ijms24032260), 2023-01-23
Supplement: s1 [file s1]

**Table S1.** Studies included in this review (chronological order).

| Study                        | PURA syndrome | 5q31.3 microdeletion syndrome | Reference |
|------------------------------|---------------|-------------------------------|-----------|
| Hosoki et al. 2012           |               | 3                             | [7]       |
| Brown et al. 2013            |               | 2                             | [40]      |
| Hunt et al. 2014             | 4             |                               | [9]       |
| Lalani et al. 2014           | 11            |                               | [6]       |
| Bonaglia et al. 2015         |               | 1                             | [41]      |
| Tanaka et al. 2015           | 6             |                               | [42]      |
| Okamoto et al. 2017          | 1             |                               | [43]      |
| Rezkalla et al. 2017         | 1             |                               | [44]      |
| Lee et al. 2017              | 14            |                               | [36]      |
| Reijnders et al. 2018        | 32            |                               | [39]      |
| Mayorga et al. 2018          | 1             |                               | [45]      |
| Shimojima et al. 2018        |               | 1                             | [46]      |
| Trau et al. 2019             | 1             |                               | [47]      |
| Rodriguez-Garcia et al. 2020 | 1             |                               | [48]      |
| Jezela Stanek et al. 2020    | 1             |                               | [49]      |
| Clinquina et al. 2021        | 1             |                               | [50]      |
| Mroczek et al. 2021          | 1             |                               | [51]      |
| Liu et al. 2021              | 1             |                               | [52]      |
| Solazzi et al. 2021          | 1             |                               | [53]      |
| Choi et al. 2021             | 5             | 2                             | [54]      |
| Lin et al. 2021              | 1             |                               | [55]      |
| Johannesen et al. 2021       | 67            |                               | [35]      |
| Wyrebek et al. 2022          | 1             |                               | [34]      |
| Nogueira et al. 2022         | 1             |                               | [56]      |
| Fukuda et al. 2022           | 1             |                               | [57]      |
| Qashquari et al.2022         | 1             |                               | [38]      |
| Dai et al.2022               | 24            | 1                             | [8]       |
